# Supplementary material
Source: PubMed Central journal article supplement (PMC4248702)
Supplement: EC.00137-14_zek999094350so1.pdf [file EC.00137-14_zek999094350so1.pdf]

## *Supplemental Material*

### **The high capacity specific fructose facilitator ZrFfz1 is essential for the fructophilic behavior of *Zygosaccharomyces rouxii* CBS 732<sup>T</sup>**

Maria José Leandro<sup>a,b,#</sup>, Sara Cabral<sup>b</sup>, Catarina Prista<sup>b</sup>, Maria C. Loureiro-Dias<sup>b</sup> and Hana Sychrová<sup>a</sup>

<sup>a</sup>Department of Membrane Transport, Institute of Physiology AS CR, v.v.i., Prague, Czech Republic

<sup>b</sup>Centre for Botany Applied to Agriculture (CBAA), Instituto Superior de Agronomia, University of Lisbon, Lisbon, Portugal

# Address correspondence to Maria José Leandro, [mjleandro@isa.ulisboa.pt](mailto:mjleandro@isa.ulisboa.pt)

## SUPPLEMENTAL MATERIAL LEGENDS

**TABLE S1** Primers used in this study.

**TABLE S2** Plasmids constructed in this study.

**FIG S1** Values of  $V_{\max}$  of fructose and glucose transport in *Z. rouxii* strains CBS 732<sup>T</sup>, UL4, F1 (*Zrffz1*Δ), F2 (*Zrffz2*Δ) and F1F2 (*Zrffz1*Δ *Zrffz2*Δ) grown in 2% glucose. Values result from GraphPad Prism Michaelis-Menten regression analysis of data from at least two independent experiments. Dotted lines represent values obtained for strain UL4.

**FIG S2** Growth curves (in microplates) of *Z. rouxii* CBS 732<sup>T</sup> (circles) and UL4 (triangles) strains in YNB medium supplemented with 2% fructose (filled symbols) or 2% glucose (empty symbols). Data are representative of at least two independent experiments.

**FIG S3** Fructose and glucose consumption profiles of *Z. rouxii* strains CBS 732<sup>T</sup> (A), UL4 (B), F1 (*Zrffz1*Δ; C), F2 (*Zrffz2*Δ; D), F1F2 (*Zrffz1*Δ *Zrffz2*Δ; E) and F1F2S1 (*Zrffz1*Δ *Zrffz2*Δ *Zrfsy1*Δ; F) grown in YNB + 10 g L<sup>-1</sup> fructose + 10 g L<sup>-1</sup> glucose. Data are representative of at least two independent experiments and error bars (SD) are shown.

**FIG S4** Fructose and glucose consumption profiles of *Z. rouxii* strains F1F2 [pZEU] (A), F1F2 [pZGFP\_*ZrFFZ2*] (B), F1F2 [pZEU\_*ZrFFZ1*] (C), F1F2 [pZEU\_*ZrFFZ2*] (D), F1F2 [pZCA\_*ZrFFZ1*] (E) and F1F2 [pZCA\_*ZrFFZ2*] (F) grown in YNB + 10 g L<sup>-1</sup> fructose + 10 g L<sup>-1</sup> glucose. Data are representative of at least two independent experiments and error bars (SD) are shown.

**TABLE S1** Primers used in this study.

| Primer          | Sequence (5'-3')*                                                                                                                                |
|-----------------|--------------------------------------------------------------------------------------------------------------------------------------------------|
| ZrFFZ1-Kan-F    | 5'- <u>CACAATATTTTCGATCATAACGGTTTCCACTGTCTTCAAAGGAAGAA</u><br><u>TAAGGGTCATTA AAACTGATTTTTAAATTTCAAATTCGTACGCTGCAG</u><br>GTCGAC-3'              |
| ZrFFZ1-Kan-R    | 5'- <u>TTTGTTAATTATAATAACAGAAAAAAGACAAATGAAAACAGAAATG</u><br><u>TTATGAAATGAAATGAAATGAAATGACAACGTGCATAGGCCGCTAGT</u><br>GGATCTG-3'                |
| ZrFFZ2-Kan-F2   | 5'- <u>TTGTTCCTTTCCGTGTTATTTTTCCGTATAGTTTTCCGTAGACTA</u><br><u>TTGAACTCTTCACGGTACAACCCATAGAGAACAAAACACTATTTTCGT</u><br>ACGCTGCAGGTCGAC-3'        |
| ZrFFZ2-Kan-R2   | 5'- <u>CATAAATATCTATCCATTACATTATCTCGAATTTGCTCCAAGTGGAC</u><br><u>TGTCGTAAGTATCTTAATGAACATTTGTCATTGCCCTACTGTTGCATA</u><br>GGCCACTAGTGGATCTG-3'    |
| ZrFSY1-Kan-F    | 5'- <u>CCGGTAAGTTCACCCATCCATATTTTTCAAGCTTCTCTAACAGGAT</u><br><u>TTTTCAGATACGTAGAAGAAGTTGTGTCAAAGAATAACAGCGGTTTCG</u><br>TACGCTGCAGGTCGAC-3' (1)  |
| ZrFSY1-Kan-R    | 5'- <u>TGAGAACCTGTAAAGAATCAACTGTTTTGACTCTCTTCGCTCCCC</u><br><u>TATCCATTCTGTCTCTAATAGCTTAGTTTACCTCTTTTCAACCAGCATA</u><br>GGCCACTAGTGGATCTG-3' (1) |
| ZrFFZ1-361up-F  | 5'-TGGTCTCCTTTTCGTATGTGG-3'                                                                                                                      |
| ZrFFZ1-456d-R2  | 5'-CAGTATTTGTTAGTGTTAGCTTG-3'                                                                                                                    |
| ZrFFZ2-521up-F2 | 5'-TTTCCGTCGTGTGCGTATCTTTC-3'                                                                                                                    |
| ZrFFZ2-492d-R2  | 5'-AATTGGAGACTGAGCCTTTTCGC-3'                                                                                                                    |
| ZrFSY1-368-upF  | 5'-AGGATGATCACTGACTACTTGC-3' (1)                                                                                                                 |
| ZrFSY1-246d-R   | 5'-GCATCATGTAATACGACGACC-3' (1)                                                                                                                  |
| KANX-R1         | 5'-CTCTGGCGCATCGGGC-3'                                                                                                                           |
| KANX-F1         | 5'-CATTTGATGCTCGATGA-3'                                                                                                                          |
| ZrFFZ1-ZEU-F    | 5'-AACGACGGCCAGTGAATTCGAGCTCGGTACCCGGGGATCCAGAA<br>GCATTGCCTTGAACCTG-3'                                                                          |

|               |                                                                          |
|---------------|--------------------------------------------------------------------------|
| ZrFFZ1-ZEU-R  | 5'-TGATTACGCCAAGCTTGCATGCCTGCAGGTCGACTCTAGATCATG<br>CACGACCAGTATGGCC-3'  |
| ZrFFZ1-ZCA-F  | 5'-TGATTACGCCAAGCTTGCATGCCTGCAGGTCGACTCTAGAAGAAG<br>CATTGCCTTGAACCTG-3'  |
| ZrFFZ1-ZCA-R  | 5'-AACGACGGCCAGTGAATTCGAGCTCGGTACCCGGGGATCCTCAT<br>GCACGACCAGTATGGCC-3'  |
| ZrFFZ2-ZEU-F  | 5'-AACGACGGCCAGTGAATTCGAGCTCGGTACCCGGGGATCCAAAG<br>GGGTTTGAAAGTAATCTC-3' |
| ZrFFZ2-ZEU-R  | 5'-TGATTACGCCAAGCTTGCATGCCTGCAGGTCGACTCTAGATTAAT<br>GAACATTTGTCATTGC-3'  |
| ZrFFZ2-ZGFP-R | 5'-CAGTGAATAATTCTTCACCTTTAGACATTTTAATAAAGCTATGAACA<br>TTTGTCATTGCCC-3'   |
| ZrFFZ2-ZCA-F  | 5'-TGATTACGCCAAGCTTGCATGCCTGCAGGTCGACTCTAGAAAAGG<br>GGTTTGAAAGTAATCTC-3' |
| ZrFFZ2-ZCA-R  | 5'-AACGACGGCCAGTGAATTCGAGCTCGGTACCCGGGGATCCTTAAT<br>GAACATTTGTCATTGC-3'  |

---

\*Sequences homologous to the *Z. rouxii* genes to be deleted are underlined. Sequences homologous to *Z. rouxii* genes to be cloned are in italics.

## REFERENCE

1. **Leandro MJ, Sychrová H, Prista C, Loureiro-Dias MC.** 2013. ZrFsy1, a high-affinity fructose/H<sup>+</sup> symporter from fructophilic yeast *Zygosaccharomyces rouxii*. PLoS One **8**:e68165.

**TABLE S2** Plasmids constructed in this study.

| <b>Gene</b>   | <b>Primers used to amplify genes</b> | <b>Plasmid</b> | <b>Constructed plasmid</b> |
|---------------|--------------------------------------|----------------|----------------------------|
| <i>ZrFFZ1</i> | ZrFFZ1-ZEU-F and ZrFFZ1-ZEU-R        | pZEU           | pZEU_ZrFFZ1                |
|               | ZrFFZ1-ZCA-F and ZrFFZ1-ZCA-R        | pZCA           | pZCA_ZrFFZ1                |
| <i>ZrFFZ2</i> | ZrFFZ2-ZEU-F and ZrFFZ2-ZEU-R        | pZEU           | pZEU_ZrFFZ2                |
|               | ZrFFZ2-ZEU-F and ZrFFZ2-ZGFP-R       | pZGFP          | pZGFP_ZrFFZ2               |
|               | ZrFFZ2-ZCA-F and ZrFFZ2-ZCA-R        | pZCA           | pZCA_ZrFFZ2                |

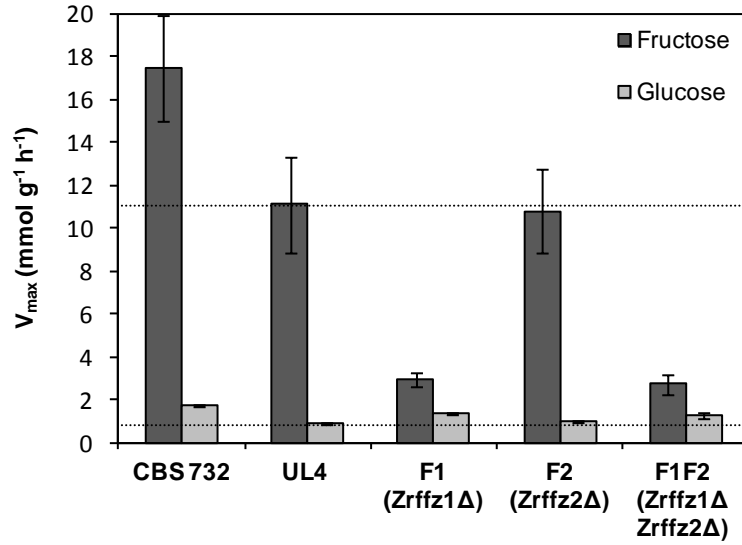

**FIG S1** Values of  $V_{max}$  of fructose and glucose transport in *Z. rouxii* strains CBS 732<sup>T</sup>, UL4, F1 ( $Zrffz1\Delta$ ), F2 ( $Zrffz2\Delta$ ) and F1F2 ( $Zrffz1\Delta Zrffz2\Delta$ ) grown in 2% glucose. Values result from GraphPad Prism Michaelis-Menten regression analysis of data from at least two independent experiments. Dotted lines represent values obtained for strain UL4.

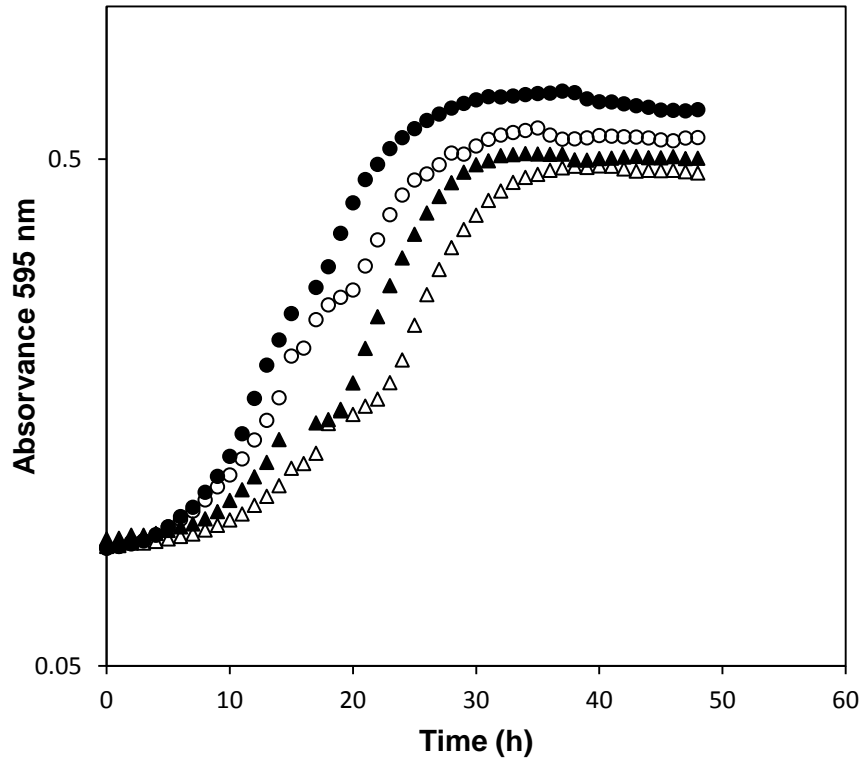

**FIG S2** Growth curves (in microplates) of *Z. rouxii* CBS 732<sup>T</sup> (circles) and UL4 (triangles) strains in YNB medium supplemented with 2% fructose (filled symbols) or 2% glucose (empty symbols). Data are representative of at least two independent experiments.

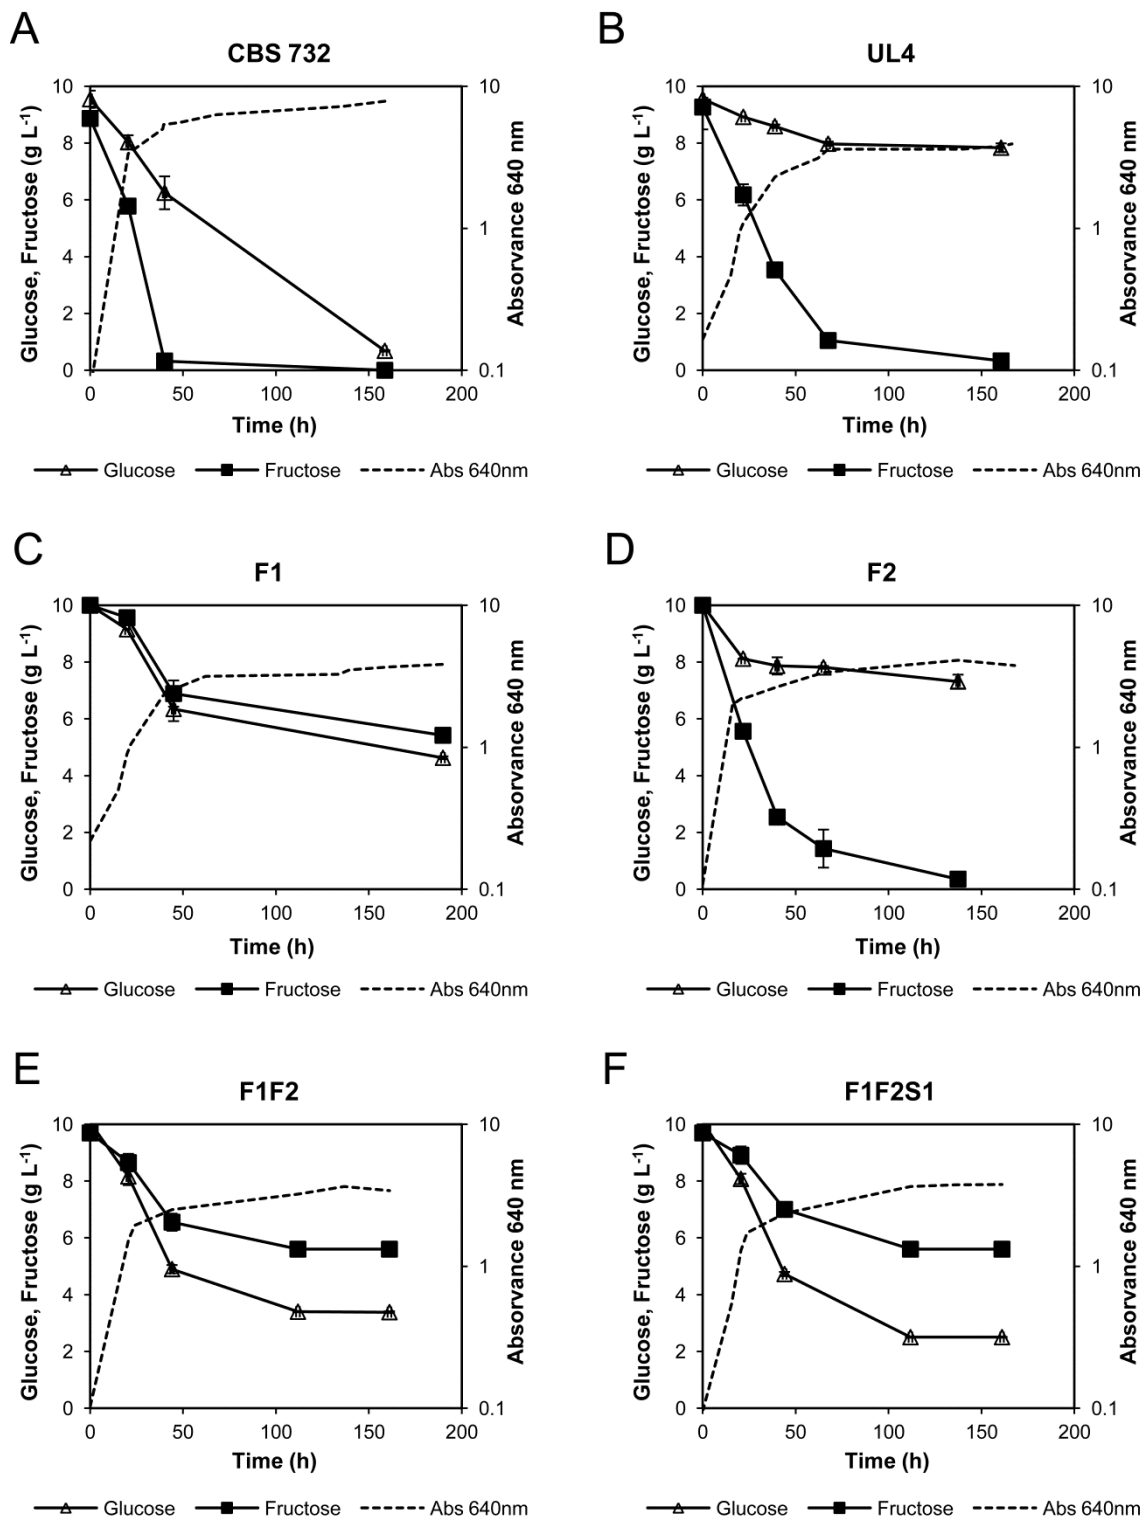

**FIG S3** Fructose and glucose consumption profiles of *Z. rouxii* strains CBS 732<sup>T</sup> (A), UL4 (B), F1 (*Zrffz1Δ*; C), F2 (*Zrffz2Δ*; D), F1F2 (*Zrffz1Δ Zrffz2Δ*; E) and F1F2S1 (*Zrffz1Δ Zrffz2Δ Zrfsy1Δ*; F) grown in YNB + 10 g L<sup>-1</sup> fructose + 10 g L<sup>-1</sup> glucose. Data are representative of at least two independent experiments and error bars (SD) are shown.



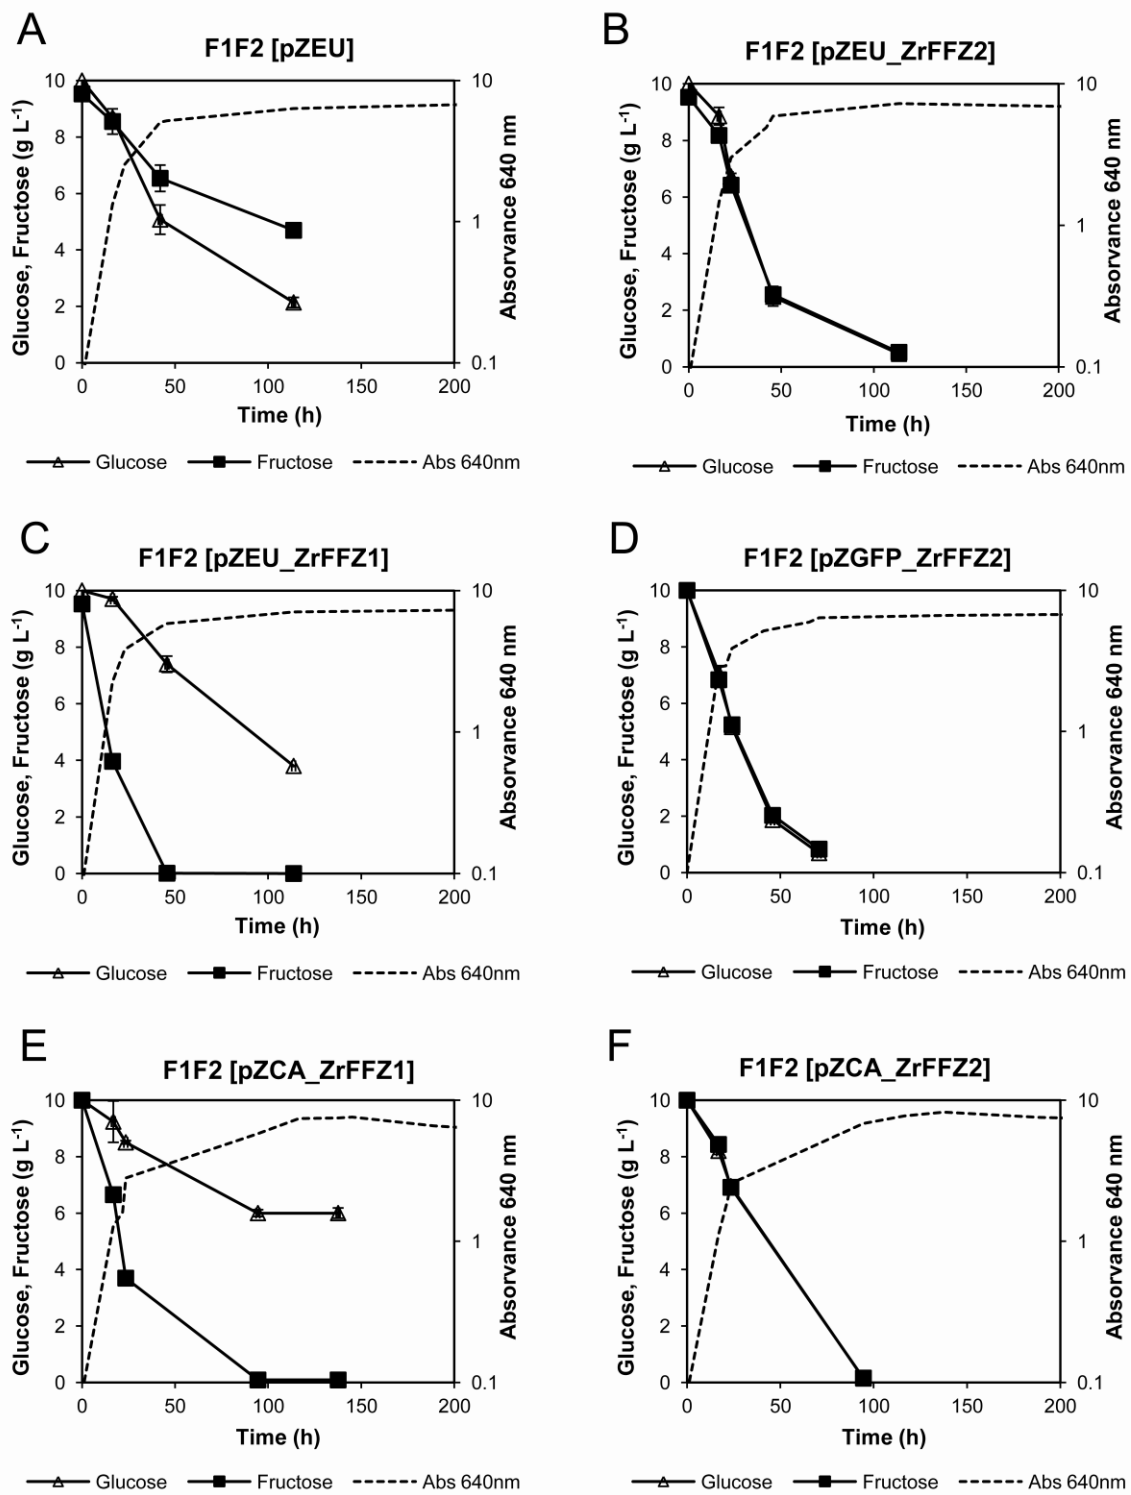

**FIG S4** Fructose and glucose consumption profiles of *Z. rouxii* strains F1F2 [pZEU] (A), F1F2 [pZGFP\_ZrFFZ2] (B), F1F2 [pZEU\_ZrFFZ1] (C), F1F2 [pZEU\_ZrFFZ2] (D), F1F2 [pZCA\_ZrFFZ1] (E) and F1F2 [pZCA\_ZrFFZ2] (F) grown in YNB + 10 g L<sup>-1</sup> fructose + 10 g L<sup>-1</sup> glucose. Data are representative of at least two independent experiments and error bars (SD) are shown.
